# Supplementary material for: Quantitative Analysis of Transcription Termination via Position-Selective Labeling of RNA (PLOR) Method
Source: MDPI journal article supplement (doi:10.3390/ijms24054934), 2023-03-03
Supplement: s1 [file s1]

## Supplementary Information

### Quantitative analysis of transcriptional termination by Position-selective Labeling of RNA (PLOR) method

Ping-yi Chien<sup>1</sup>, Lingzhi Gao<sup>1</sup>, and Yu Liu<sup>1,\*</sup>

<sup>1</sup>State Key Laboratory of Microbial Metabolism, School of Life Science and Biotechnology, Shanghai Jiao Tong University, Shanghai, P. R. China.

\*Corresponding author, E-mail: liuyu\_sjtu@sjtu.edu.cn

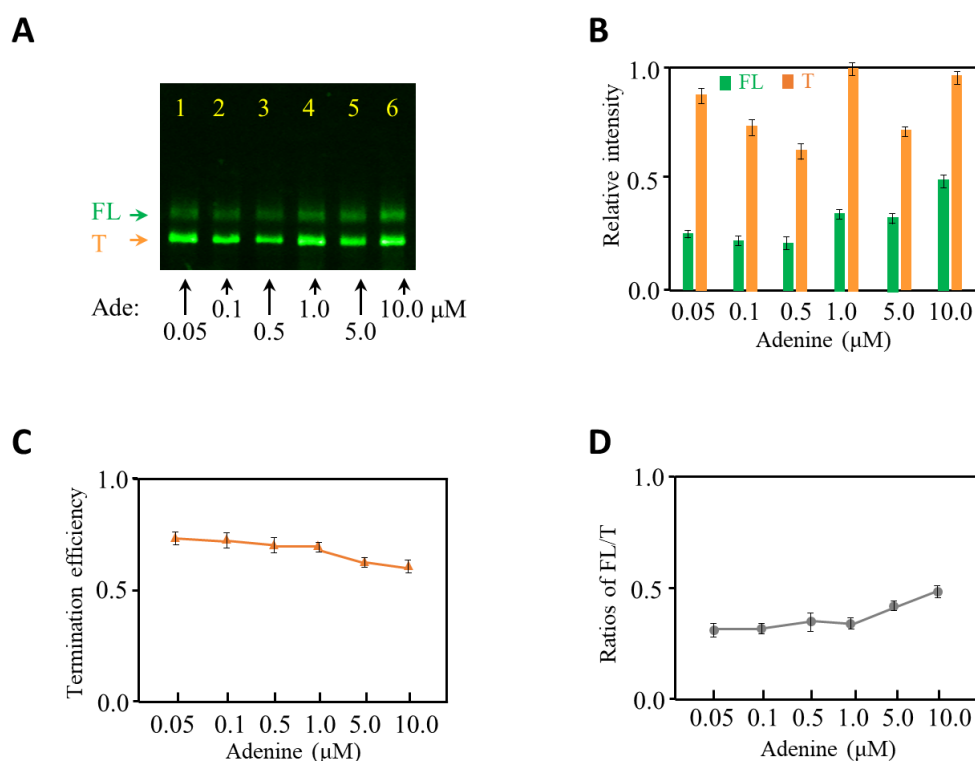

**Supplementary Figure S1.** Transcription termination studies of adenine riboswitch at 0.05~10.0  $\mu$ M adenine. (A) Denaturing PAGE gel image of the crude products generated from 8-step PLOR reactions in the presence of 0.05~10.0  $\mu$ M adenine. The full-length and terminated products are marked by FL and T respectively. The gel was irradiated under fluorescence 550 nm. (B) The relative intensities of FL (in green) and T (in orange) produced at 0.05~10.0  $\mu$ M adenine. The experiments were repeated three times. (C) Termination efficiency of adenine riboswitch transcription as a function of adenine concentration. (D) The ratios of FL to T of adenine riboswitch transcription as a function of adenine concentration.

**Supplementary Table S1: Sequences of DNA templates, primers and adenine riboswitch RNA**

| DNA/RNA sequences                             | Sequence 5'→3'                                                                                                                                                                             |
|-----------------------------------------------|--------------------------------------------------------------------------------------------------------------------------------------------------------------------------------------------|
| forward primer used in PCR                    | Biotin-TCTGATTCAGCTAGTCCATAATACGACT                                                                                                                                                        |
| reverse primer used in PCR                    | CCGCGGATGCGGAAAAAAAT                                                                                                                                                                       |
| The non-coding strand of DNA template in PLOR | Biotin- <i>TCTGATTCAGCTAGTCCATAATACGACTCACTATA</i><br>GGGAAGTTGTATAACCTCAATAATATGGTTTGAGGGTG<br>TCTACCAGGAACCGTAAATCCTGATTACAAAATTTGT<br>TTATGACATTTTTTTGTAATCAGGATTTTTTTTCCGCATCC<br>GCGG |
| The coding strand of DNA template in PLOR     | CCGCGGATGCGGAAAAAAATCCTGATTACAAAAAAT<br>GTCATAAACAAATTTTGTAATCAGGATTTTACGGTTCCT<br>GGTAGACACCCTCAAACCATATTATTGAGGTTATACAA<br>CTTCCCTATAGTGAGTCGTATTA <i>TGGACTAGCTGAATCAG</i><br><i>A</i>  |
| Adenine riboswitch RNA                        | GGGAAGUUGUAUAACCUCAAUAUAUGGUUUGAGG<br>GUGUCUACCAGGAACCGUAAAAUCCUGAUUACAAAA<br>UUUGUUUAUGACAUUUUUUGUAAUCAGGAUUUUUU<br>UCCGCAUCCGCGG                                                         |

A linker (italicized) was added upstream of the T7 promoter (underlined).

**Supplementary Table S2: Reagent usage in 5 μM, 100 μL 3-step PLOR**

|                                                                                                                                                                                                                                                                                                                                                                                                                                    |
|------------------------------------------------------------------------------------------------------------------------------------------------------------------------------------------------------------------------------------------------------------------------------------------------------------------------------------------------------------------------------------------------------------------------------------|
| <p><b>Step 1: 37 °C, 15 min in the buffer (40 mM Tris-HCl, 100 mM K<sub>2</sub>SO<sub>4</sub>, 6 mM MgSO<sub>4</sub>, 10 mM DTT, pH 8.0)</b><br/> Step 1: 400 μM ATP, 600 μM GTP, 64 μM UTP;</p> <p><b>Steps 2-3: 25 °C, 10 min in the buffer (40 mM Tris-HCl, 6 mM MgSO<sub>4</sub>, 0 or 1 mM adenine, pH 8.0)</b><br/> Step 2: 25 μM ATP, 15 μM CTP, 20 μM UTP;<br/> Step 3: 115 μM ATP, 80 μM CTP, 100 μM GTP, 175 μM UTP.</p> |
|------------------------------------------------------------------------------------------------------------------------------------------------------------------------------------------------------------------------------------------------------------------------------------------------------------------------------------------------------------------------------------------------------------------------------------|

**Supplementary Table S3: Reagent usage in 5  $\mu$ M, 100  $\mu$ L 6-step PLOR**

**Step 1: 37 °C, 15 min in the buffer (40 mM Tris-HCl, 100 mM K<sub>2</sub>SO<sub>4</sub>, 6 mM MgSO<sub>4</sub>, 10 mM DTT, pH 8.0)**

Step 1: 400  $\mu$ M ATP, 600  $\mu$ M GTP, 64  $\mu$ M UTP;

**Steps 2-6: 25 °C, 10 min in the buffer (40 mM Tris-HCl, 6 mM MgSO<sub>4</sub>, 0 or 1 mM adenine, pH 8.0)**

Step 2: 25  $\mu$ M ATP, 15  $\mu$ M CTP, 20  $\mu$ M UTP;

Step 3: 5  $\mu$ M ATP, 35  $\mu$ M GTP, 25  $\mu$ M UTP;

Step 4: 10  $\mu$ M ATP, 15  $\mu$ M CTP, 5  $\mu$ M UTP;

Step 5: 10  $\mu$ M ATP, 10  $\mu$ M CTP, 15  $\mu$ M GTP;

Step 6: 90  $\mu$ M ATP, 55  $\mu$ M CTP, 50  $\mu$ M GTP, 145  $\mu$ M UTP.

**Supplementary Table S4: Reagent usage in 5  $\mu$ M, 100  $\mu$ L 8-step PLOR**

**Step 1: 37 °C, 15 min in the buffer (40 mM Tris-HCl, 100 mM K<sub>2</sub>SO<sub>4</sub>, 6 mM MgSO<sub>4</sub>, 10 mM DTT, pH 8.0)**

Step 1: 400  $\mu$ M ATP, 600  $\mu$ M GTP, 64  $\mu$ M UTP;

**Steps 2-8: 25 °C, 10 min in the buffer (40 mM Tris-HCl, 6 mM MgSO<sub>4</sub>, 0 or 1 mM adenine, pH 8.0)**

Step 2: 25  $\mu$ M ATP, 15  $\mu$ M CTP, 20  $\mu$ M UTP;

Step 3: 5  $\mu$ M ATP, 35  $\mu$ M GTP, 25  $\mu$ M UTP;

Step 4: 10  $\mu$ M ATP, 15  $\mu$ M CTP, 5  $\mu$ M UTP;

Step 5: 10  $\mu$ M ATP, 10  $\mu$ M CTP, 15  $\mu$ M GTP;

Step 6: 20  $\mu$ M ATP, 10  $\mu$ M CTP, 15  $\mu$ M UTP;

Step 7: 10  $\mu$ M ATP, 5  $\mu$ M GTP, 10  $\mu$ M UTP;

Step 8: 60  $\mu$ M ATP, 45  $\mu$ M CTP, 45  $\mu$ M GTP, 120  $\mu$ M UTP.

**Supplementary Table S5: Reagent usage in 5  $\mu$ M, 100  $\mu$ L 8-step PLOR for testing adenine**

**Step 1: 37 °C, 15 min in the buffer (40 mM Tris-HCl, 100 mM K<sub>2</sub>SO<sub>4</sub>, 6 mM MgSO<sub>4</sub>, 10 mM DTT, pH 8.0)**

Step 1: 400  $\mu$ M ATP, 600  $\mu$ M GTP, 64  $\mu$ M UTP;

**Steps 2-7: 25 °C, 10 min in the buffer (40 mM Tris-HCl, 6 mM MgSO<sub>4</sub>, 0~10 mM adenine, pH 8.0)**

Step 2: 25  $\mu$ M ATP, 15  $\mu$ M CTP, 20  $\mu$ M UTP;

Step 3: 5  $\mu$ M ATP, 35  $\mu$ M GTP, 25  $\mu$ M UTP;

Step 4: 10  $\mu$ M ATP, 15  $\mu$ M CTP, 5  $\mu$ M UTP;

Step 5: 10  $\mu$ M ATP, 10  $\mu$ M CTP, 15  $\mu$ M GTP;

Step 6: 20  $\mu$ M ATP, 10  $\mu$ M CTP, 15  $\mu$ M UTP;

Step 7: 10  $\mu$ M ATP, 5  $\mu$ M GTP, 10  $\mu$ M UTP;

**Steps 8: 25 °C, 10 min in the buffer (40 mM Tris-HCl, 6 mM MgSO<sub>4</sub>, 0~10 mM adenine, pH 8.0)**

Step 8: 60  $\mu$ M ATP, 45  $\mu$ M CTP, 45  $\mu$ M GTP, 120  $\mu$ M UTP.

**Supplementary Table S6: Reagent usage in 5  $\mu$ M, 100  $\mu$ L 8-step PLOR for testing Mg<sup>2+</sup>**

**Step 1: 37 °C, 15 min in the buffer (40 mM Tris-HCl, 100 mM K<sub>2</sub>SO<sub>4</sub>, 6 mM MgSO<sub>4</sub>, 10 mM DTT, pH 8.0)**

Step 1: 400  $\mu$ M ATP, 600  $\mu$ M GTP, 64  $\mu$ M UTP;

**Steps 2-7: 25 °C, 10 min in the buffer (40 mM Tris-HCl, 6 mM MgSO<sub>4</sub>, 0 or 1 mM adenine, pH 8.0)**

Step 2: 25  $\mu$ M ATP, 15  $\mu$ M CTP, 20  $\mu$ M UTP;

Step 3: 5  $\mu$ M ATP, 35  $\mu$ M GTP, 25  $\mu$ M UTP;

Step 4: 10  $\mu$ M ATP, 15  $\mu$ M CTP, 5  $\mu$ M Cy3-UTP (30 °C, 10 min);

Step 5: 10  $\mu$ M ATP, 10  $\mu$ M CTP, 15  $\mu$ M GTP;

Step 6: 20  $\mu$ M ATP, 10  $\mu$ M CTP, 15  $\mu$ M UTP;

Step 7: 10  $\mu$ M ATP, 5  $\mu$ M GTP, 10  $\mu$ M UTP;

**Steps 8: 25 °C, 10 min in the buffer (40 mM Tris-HCl, 0.5~26 mM MgSO<sub>4</sub>, 0 or 1 mM adenine, pH 8.0)**

Step 8: 60  $\mu$ M ATP, 45  $\mu$ M CTP, 45  $\mu$ M GTP, 120  $\mu$ M UTP.

**Supplementary Table S7: Reagent usage in 5  $\mu$ M, 100  $\mu$ L 8-step PLOR for testing NTPs**

|                                                                                                                                                                                                                                                                                                                                                                                                                                                                                                    |
|----------------------------------------------------------------------------------------------------------------------------------------------------------------------------------------------------------------------------------------------------------------------------------------------------------------------------------------------------------------------------------------------------------------------------------------------------------------------------------------------------|
| <b>Step 1: 37 °C, 15 min in the buffer (40 mM Tris-HCl, 100 mM K<sub>2</sub>SO<sub>4</sub>, 6 mM MgSO<sub>4</sub>, 10 mM DTT, pH 8.0)</b><br>Step 1: 400 $\mu$ M ATP, 600 $\mu$ M GTP, 64 $\mu$ M UTP;                                                                                                                                                                                                                                                                                             |
| <b>Steps 2-7: 25 °C, 10 min in the buffer (40 mM Tris-HCl, 6 mM MgSO<sub>4</sub>, 0 or 1 mM adenine, pH 8.0)</b><br>Step 2: 25 $\mu$ M ATP, 15 $\mu$ M CTP, 20 $\mu$ M UTP;<br>Step 3: 5 $\mu$ M ATP, 35 $\mu$ M GTP, 25 $\mu$ M UTP;<br>Step 4: 8 $\mu$ M ATP, 12 $\mu$ M CTP, 4 $\mu$ M Cy3-UTP (30 °C, 10 min);<br>Step 5: 10 $\mu$ M ATP, 10 $\mu$ M CTP, 15 $\mu$ M GTP;<br>Step 6: 20 $\mu$ M ATP, 10 $\mu$ M CTP, 15 $\mu$ M UTP;<br>Step 7: 10 $\mu$ M ATP, 5 $\mu$ M GTP, 10 $\mu$ M UTP; |
| <b>Steps 8: 25 °C, 10 min in the buffer (40 mM Tris-HCl, 6 mM MgSO<sub>4</sub>, 0 or 1 mM adenine, pH 8.0)</b><br>Step 8 for 0.5X NTP: 30 $\mu$ M ATP, 22.5 $\mu$ M CTP, 22.5 $\mu$ M GTP, 60 $\mu$ M UTP;<br>Step 8 for 1X NTP: 60 $\mu$ M ATP, 45 $\mu$ M CTP, 45 $\mu$ M GTP, 120 $\mu$ M UTP;<br>Step 8 for 2X NTP: 120 $\mu$ M ATP, 90 $\mu$ M CTP, 90 $\mu$ M GTP, 240 $\mu$ M UTP;<br>Step 8 for 10X NTP: 600 $\mu$ M ATP, 450 $\mu$ M CTP, 450 $\mu$ M GTP, 1.2 mM UTP.                    |

**Supplementary Table S8: Reagent usage in 5  $\mu$ M, 100  $\mu$ L 10-step PLOR**

|                                                                                                                                                                                                                                                                                                                                                                                                                                                                                                                                                                                                                                                                                   |
|-----------------------------------------------------------------------------------------------------------------------------------------------------------------------------------------------------------------------------------------------------------------------------------------------------------------------------------------------------------------------------------------------------------------------------------------------------------------------------------------------------------------------------------------------------------------------------------------------------------------------------------------------------------------------------------|
| <b>Step 1: 37 °C, 15 min in the buffer (40 mM Tris-HCl, 100 mM K<sub>2</sub>SO<sub>4</sub>, 6 mM MgSO<sub>4</sub>, 10 mM DTT, pH 8.0)</b><br>Step 1: 400 $\mu$ M ATP, 600 $\mu$ M GTP, 64 $\mu$ M UTP;                                                                                                                                                                                                                                                                                                                                                                                                                                                                            |
| <b>Steps 2-10: 25 °C, 10 min in the buffer (40 mM Tris-HCl, 6 mM MgSO<sub>4</sub>, 0 or 1 mM adenine, pH 8.0)</b><br>Step 2: 25 $\mu$ M ATP, 15 $\mu$ M CTP, 20 $\mu$ M UTP;<br>Step 3: 5 $\mu$ M ATP, 35 $\mu$ M GTP, 25 $\mu$ M UTP;<br>Step 4: 10 $\mu$ M ATP, 15 $\mu$ M CTP, 5 $\mu$ M UTP;<br>Step 5: 10 $\mu$ M ATP, 10 $\mu$ M CTP, 15 $\mu$ M GTP;<br>Step 6: 20 $\mu$ M ATP, 10 $\mu$ M CTP, 15 $\mu$ M UTP;<br>Step 7: 10 $\mu$ M ATP, 5 $\mu$ M GTP, 10 $\mu$ M UTP;<br>Step 8: 20 $\mu$ M ATP, 5 $\mu$ M CTP, 15 $\mu$ M UTP;<br>Step 9: 10 $\mu$ M ATP, 10 $\mu$ M GTP, 20 $\mu$ M UTP;<br>Step 10: 30 $\mu$ M ATP, 40 $\mu$ M CTP, 35 $\mu$ M GTP, 85 $\mu$ M UTP. |
